# Supplementary material for: Ancient mitogenomes of Phoenicians from Sardinia and Lebanon: A story of settlement, integration, and female mobility
Source: PubMed Central journal article supplement (PMC5761892; doi:10.1371/journal.pone.0190169), 2018-01-10

MS10560

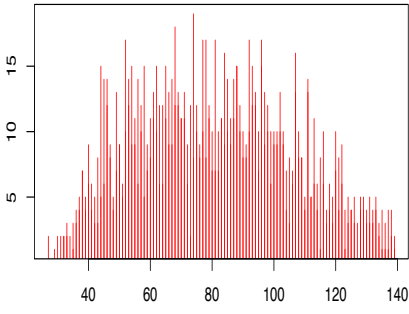

MS10562

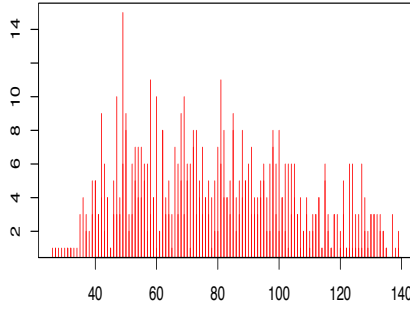

MS10565

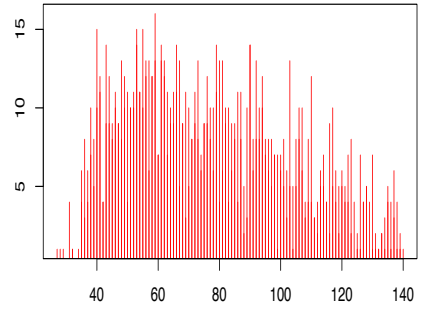

MS10575

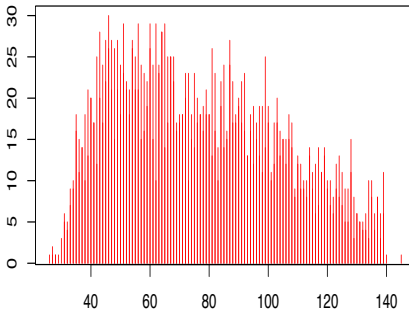

MS10577

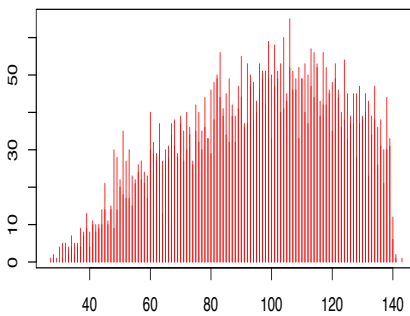

MS10578

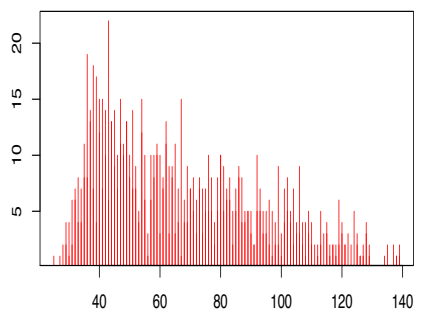

MS10579

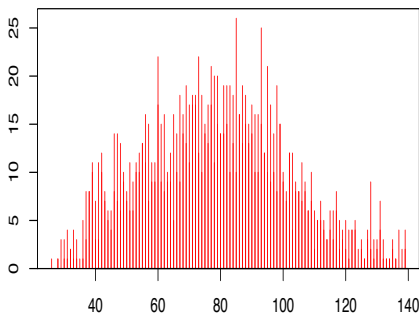

MS10580

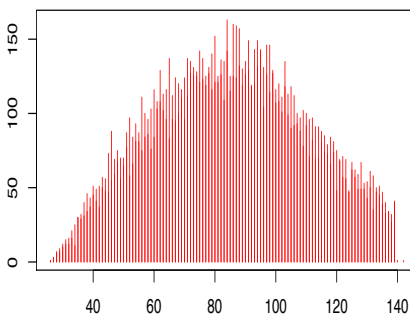

MS10581

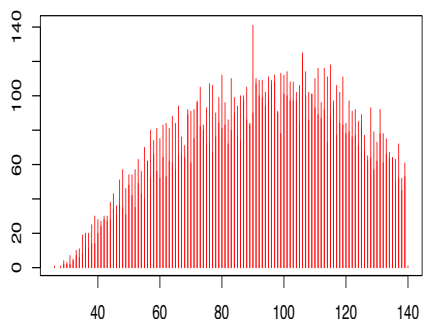

MS10582

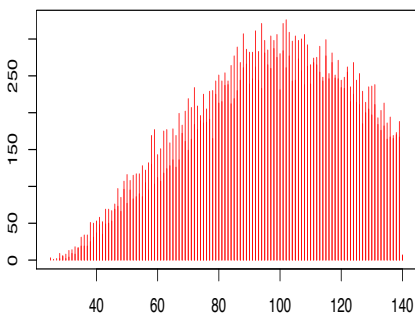

MS10584

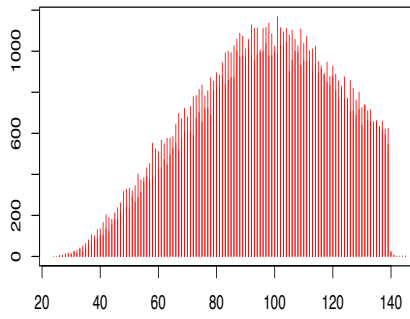

MS10585

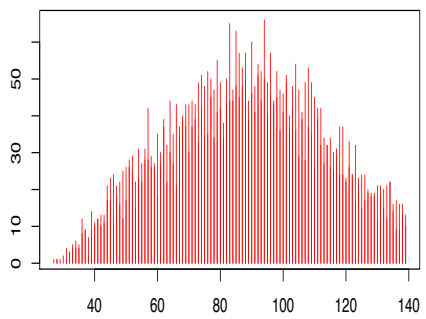

MS10587

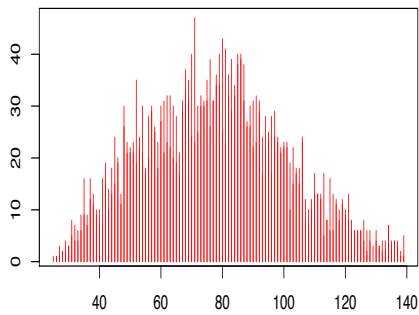

MS10588

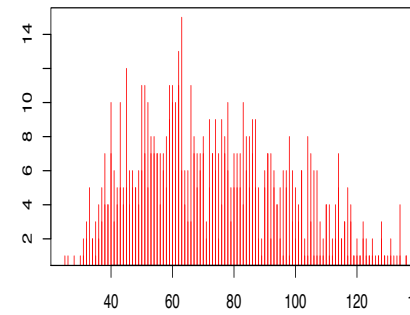

Supplement: pone.0190169.s006.pdf [file pone.0190169.s006.pdf]
