# Supplementary material for: Ancient mitogenomes of Phoenicians from Sardinia and Lebanon: A story of settlement, integration, and female mobility
Source: PLoS One. 2018 Jan 10;13(1):e0190169. doi: 10.1371/journal.pone.0190169 (PMC5761892; doi:10.1371/journal.pone.0190169)
Supplement: S1 Table — (XLSX) [file pone.0190169.s001.xlsx]

## Sheet: Sheet1
Sequence id	Origin	Haplogroup	Genbank ID
LEB2_10AJ180	Lebanon	H	KY797164
LEB72_7AJ49	Lebanon	H	KY797233
LEB81_8R4	Lebanon	H	KY797242
LEB86_9R158	Lebanon	H	KY797247
LEB1_10AF306	Lebanon	H+152	KY797163
LEB63_5AJ49	Lebanon	H+152	KY797224
LEB27_17AR19	Lebanon	H+16311	KY797189
LEB22_16AQ126	Lebanon	H+73	KY797184
LEB8_12AJ90	Lebanon	H1	KY797170
LEB87_9R4	Lebanon	H13a1+152	KY797248
LEB84_9AL53	Lebanon	H1aq	KY797245
LEB65_6AF233	Lebanon	H2a	KY797226
LEB44_2AJ183	Lebanon	H2a3b	KY797205
LEB30_18AJ183	Lebanon	H4	KY797192
LEB56_3AR24	Lebanon	H4a1	KY797217
LEB35_1AR25	Lebanon	H5b	KY797197
LEB77_8AJ182	Lebanon	H8	KY797238
LEB55_3AQ149	Lebanon	H8b	KY797216
LEB21_16AJ180	Lebanon	H8c	KY797183
LEB32_19BA72	Lebanon	H9a	KY797194
LEB61_4AR38	Lebanon	H9a	KY797222
LEB68_6AQ148	Lebanon	HV13	KY797229
LEB85_9AR21	Lebanon	HV14a	KY797246
LEB88_9R5	Lebanon	HV14a	KY797249
LEB40_24AJ152	Lebanon	HV2a1	KY797201
LEB60_4AR21	Lebanon	HV4	KY797221
LEB13_14AJ181	Lebanon	HV4a2a	KY797175
LEB69_7AF233	Lebanon	I	KY797169
LEB25_17AJ182	Lebanon	J1b1b1	KY797187
LEB3_10R7	Lebanon	J1b1b1	KY797165
LEB16_15AJ152	Lebanon	J1b4a1	KY797178
LEB48_2AL162	Lebanon	J1b4a1	KY797209
LEB82_8R5	Lebanon	J1b4a1	KY797243
LEB52_32AR21	Lebanon	J1c+16261	KY797213
LEB4_11AR25	Lebanon	J1c11a	KY797166
LEB12_13AJ49	Lebanon	J1d1a1	KY797174
LEB15_14AR25	Lebanon	J1d1a1	KY797177
LEB43_2AJ182	Lebanon	J1d1a1	KY797204
LEB5_11AR37	Lebanon	J1d1a1	KY797167
LEB62_4R172	Lebanon	J1d1a1	KY797223
LEB6_11AR38	Lebanon	J2a1a1a	KY797168
LEB64_5AQ150	Lebanon	J2b1	KY797225
LEB39_23AL42	Lebanon	J2b1f	KY797200
LEB73_7AJ90	Lebanon	K1a	KY797234
LEB31_18AJ184	Lebanon	K1a+195	KY797193
LEB79_8AL10	Lebanon	K1a4c	KY797240
LEB9_12AQ130	Lebanon	K1a6	KY797171
LEB74_7AR22	Lebanon	K1c1h	KY797235
LEB38_22AR27	Lebanon	L0a1b	KY797199
LEB46_2AJ57	Lebanon	L3f1b+16292	KY797207
LEB50_2AQ150	Lebanon	N1a1a3	KY797211
LEB7_12AJ180	Lebanon	N1b1a	KY797230
LEB71_7AJ185	Lebanon	N1b1a+16129	KY797232
LEB51_2AR22	Lebanon	N1b1a2	KY797212
LEB17_15AJ181	Lebanon	N1b1a3	KY797179
LEB34_1AL78	Lebanon	N1b1a3	KY797196
LEB49_2AL78	Lebanon	N1b1a3	KY797210
LEB58_4AJ185	Lebanon	N1b1a3	KY797219
LEB76_8AJ181	Lebanon	N1b1a3	KY797237
LEB83_9AF269	Lebanon	R	KY797244
LEB19_15AR22	Lebanon	R0a1a	KY797181
LEB47_2AL10	Lebanon	R0a1a	KY797208
LEB14_14AR21	Lebanon	R0a2c	KY797176
LEB33_1AJ182	Lebanon	R0a3a	KY797195
LEB29_18AJ182	Lebanon	T	KY797191
LEB80_8R158	Lebanon	T1a1b	KY797241
LEB45_2AJ185	Lebanon	T1a7	KY797206
LEB75_7R163	Lebanon	T1a7	KY797236
LEB24_17AJ177	Lebanon	T2	KY797186
LEB70_7AJ1	Lebanon	U1a1a	KY797231
LEB57_4AF123	Lebanon	U1a1a+16129	KY797218
LEB11_13AJ182	Lebanon	U1b3	KY797173
LEB66_6AJ185	Lebanon	U1b3	KY797227
LEB23_16AR25	Lebanon	U3a	KY797185
LEB26_17AJ184	Lebanon	U3a	KY797188
LEB41_26AR21	Lebanon	U3b	KY797202
LEB20_16AJ152	Lebanon	U3b1	KY797182
LEB78_8AJ57	Lebanon	U3b2a	KY797239
LEB54_3AJ180	Lebanon	U3b3	KY797215
LEB67_6AL53	Lebanon	U3b3	KY797228
LEB53_3AJ152	Lebanon	U4a	KY797214
LEB42_2AJ181	Lebanon	U5a2b	KY797203
LEB10_13AJ1	Lebanon	U5b2b1b	KY797172
LEB28_17AR25	Lebanon	U7a	KY797190
LEB59_4AJ57	Lebanon	V	KY797220
LEB18_15AQ148	Lebanon	X2d1	KY797180
LEB36_1AS14	Lebanon	X2i+@225	KY797198
